# Supplementary material for: Starch-assisted facile gel formation method for the synthesis of Fe–Mn binary oxide for the simultaneous removal of As(iii) and As(v)
Source: Royal Society of Chemistry journal article supplement (doi:10.1039/d4ra06319h), 2024-01-01
Supplement: d4ra06319h1.zip [file d4ra06319h1.zip]

**Electronic Supporting Information (ESI)**

Starch-assisted facile gel formation method for the synthesis of Fe-Mn binary oxide for simultaneous removal of As(III) and As(V)

Anwarul Azima, Md. Minhajul Alam Khan Jabera, Shawon Sahaa, Hridoy Royb, Akter Hossain Reaza, c, A K M Atique Ullaha, c and Shakhawat H. Firoza*

aDepartment of Chemistry, Bangladesh University of Engineering and Technology (BUET), Dhaka-1000, Bangladesh

bDepartment of Chemical Engineering, Bangladesh University of Engineering and Technology (BUET), Bangladesh

cDepartment of Chemistry, Michigan State University, East Lansing, MI 48824, USA

**Corresponding Author***

Shakhawat H. Firoz

Email: shfiroz@chem.buet.ac.bd

Contact No. +8801730-713767

**
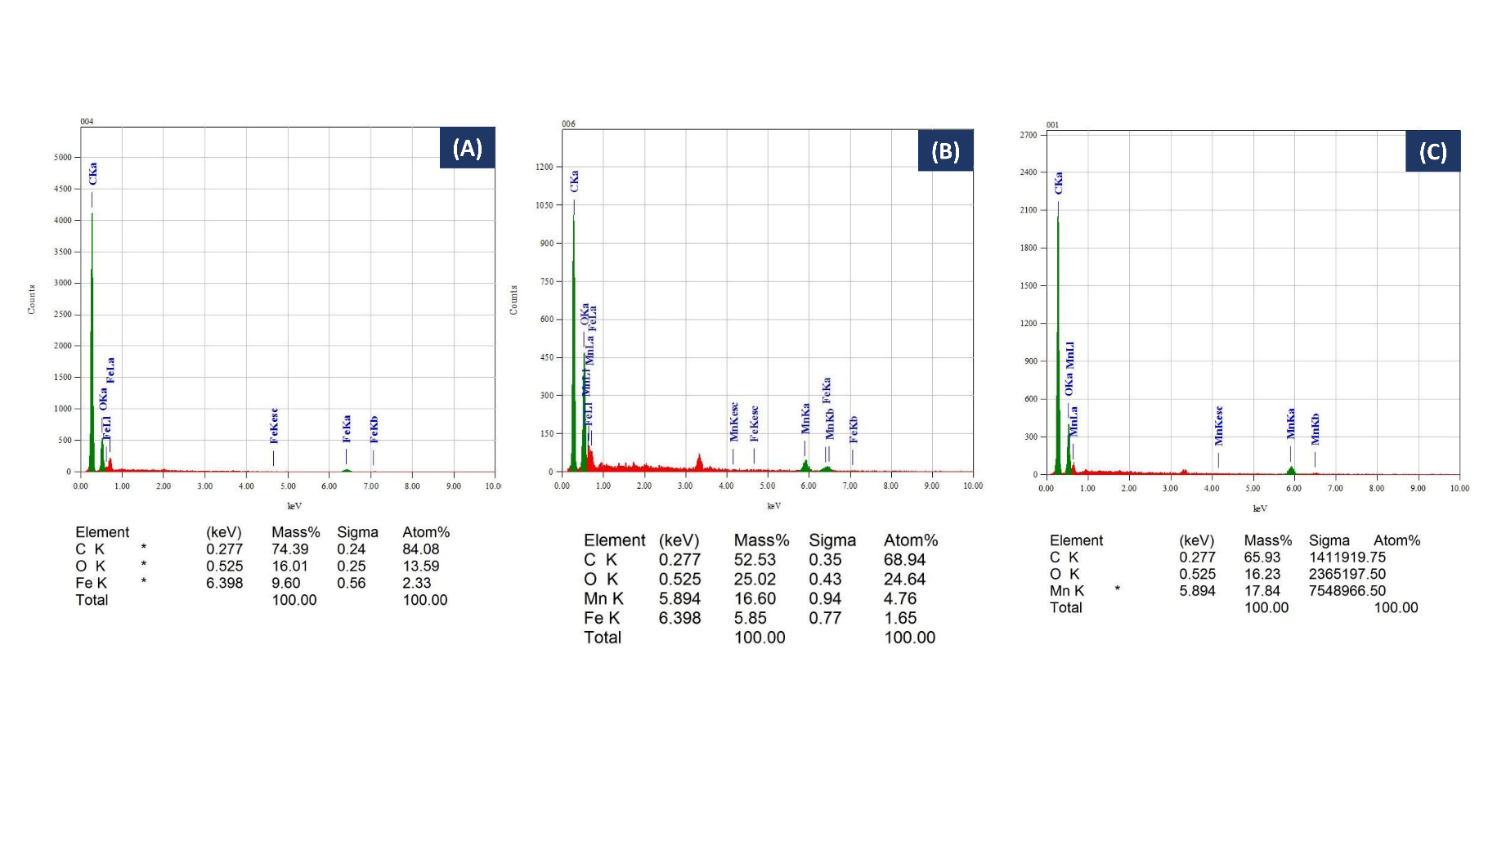
**

**Fig. S1**. Energy-dispersive X-ray spectroscopy of (a) Fe2O3 (b) MnO2 (c) FMBO


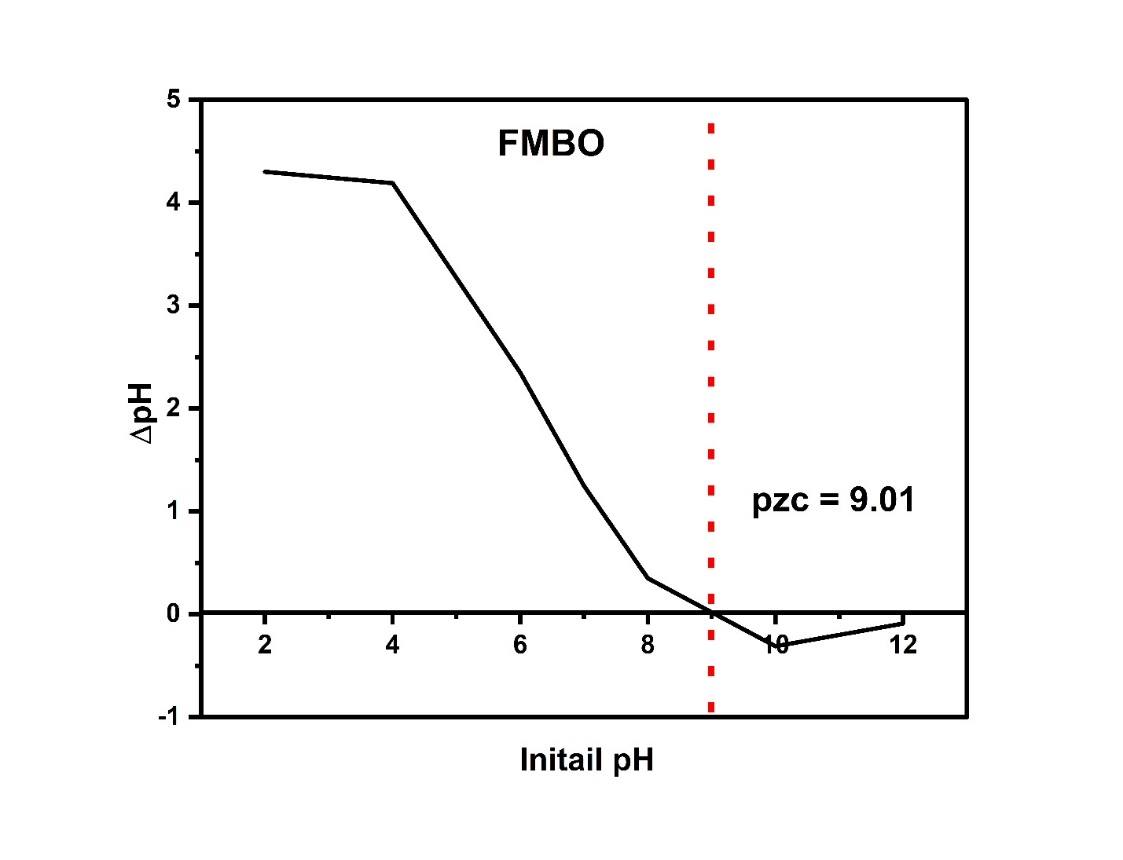


**Fig. S2**. Point of zero charge of FMBO

**Table S1:** Crystallite size and lattice parameters of Fe2O3, MnO2 and FMBO

| Materials | Crystallite size  (nm) | Crystal system | Lattice parameters | | |
| --- | --- | --- | --- | --- | --- |
| **a**  (Å) | **b**  (Å) | **c**  (Å) |
| Fe2O3 | 8.37 | Hexagonal | 5.038 | 5.038 | 13.77 |
| MnO2 | 8.73 | Tetragonal | 9.815 | 9.815 | 2.847 |
| FMBO | 11.88 | Cubic | 8.371 | 8.371 | 8.371 |

**Table S2**: Sorption capacity and sorption efficiency of Fe2O3, MnO2 and FMBO for the removal arsenic from the solutions of As(V), As(III) and (As(III) + As(V))

| **Materials** | **As(V)** | | As(III) | | As(V) + As(III) | |
| --- | --- | --- | --- | --- | --- | --- |
| **Sorption Capacity** | **sorption efficiency** | **Sorption Capacity** | **sorption efficiency** | **Sorption Capacity** | **sorption efficiency** |
| **Fe2O3** | 5.000 | 4.000 | 0.00 | 0.00 | 2.500 | 2.000 |
| **MnO2** | 0.000 | 0.000 | 0.00 | 0.00 | 0.000 | 0.000 |
| **FMBO** | 53.325 | 42.660 | 15.83 | 12.66 | 79.675 | 63.740 |
